# Supplementary material for: Low cost and robust soot dipped polyurethane sponge for highly efficient and recyclable oil and organic solvent cleanup
Source: Royal Society of Chemistry journal article supplement (doi:10.1039/c4ra10910d), 2014-01-01
Supplement: c4ra10910d1.pdf [file c4ra10910d1.pdf]

# Low Cost and Robust Soot Dipped Polyurethane Sponge for Highly Efficient and Recyclable Oils and Organic Solvents Cleanup

Pinxian Xi,<sup>ab</sup> Liang Huang,<sup>b</sup> Zhihong Xu,<sup>a</sup> Fengjuan Chen,<sup>b</sup> Li An,<sup>b</sup> Ben Wang,<sup>b</sup> and Zhong-Ning Chen<sup>\*a</sup>

<sup>a</sup>State Key Laboratory of Structural Chemistry, Fujian Institute of Research on the Structure of Matter, Chinese Academy of Sciences, Fuzhou, Fujian 350002, P. R. China  
E-mail: czn@fjirsm.ac.cn.

<sup>b</sup>Key Laboratory of Nonferrous Metal Chemistry and Resources Utilization of Gansu Province, The Research Center of Biomedical Nanotechnology and College of Chemistry and Chemical Engineering, Lanzhou University, Lanzhou, 730000, P. R. China.

## 1. Materials and Characterization

The polyurethane sponges were from Shanghai Foam Materials Co. Chloroform, acetone, Ethyl acetate, Dichromethane and Hexane were all from Tianjin Chemical Reagent Co. All the chemicals were used as received.

The morphology of the all materials was characterized using a field-emission scanning electron microscope (Hitachi, S4700 FESEM system, with an ultimate image resolution of 1.2 nm at 25 KV). Transmission electron microscopy (TEM) images were recorded on Tecnai G2 F30 Field Emission Transmission Electron Microscope. Powder X-ray diffraction (XRD) patterns were collected on a Rigaku D/Max-2400 diffractometer with Cu-K $\alpha$  radiation ( $\lambda = 1.54178 \text{ \AA}$ ). X-ray photoelectron spectroscopy (XPS) measurements were carried out on a PHI-5702 multi-functional spectrometer using Al K $\alpha$  radiation. Static water contact angle measurement was carried out using a contact angle goniometer (Powereach, JC2000D, China). A degassing process was used to remove the absorbents on the sample. The degassing was in a vacuum with 0.3 mmHg for 30 min at 80 °C.

## 2. Experimental

## 2.1 Preparation of Soot-dipped Polyurethane Sponge (SPUS)

The SPUS was prepared by dip-coating. Firstly, 100 mg of soot which was cleaned by acetone was dispersed in 30 ml of acetone solution, followed by a 60 min. sonication. Then polyurethane sponge was immersed in the soot dispersion for 10 mins before move it out and put it in the oven dried again at 60 °C for 2h. The soot loading on the sponge was defined as the weight ratio  $(SPUS_{Weight}-PUS_{Weight})/ PUS_{Weight} \times 100\%$ , where  $SPUS_{Weight}$  and  $PUS_{Weight}$  are the weight of the soot coated polyurethane and original melamine sponge, respectively.

## 2.2 Absorption measurement

In a typical absorption measurement, the SPUS was immersed into different oils and organic solvents till saturation. The absorption capacity (Q) was defined as the weight-gain ratio of the SPUS, which can be calculated using the following equation:  $Q = (M_2 - M_1)/M_1$  where  $M_1$  and  $M_2$  represent the weights of the sponge before and after oil absorption, respectively.

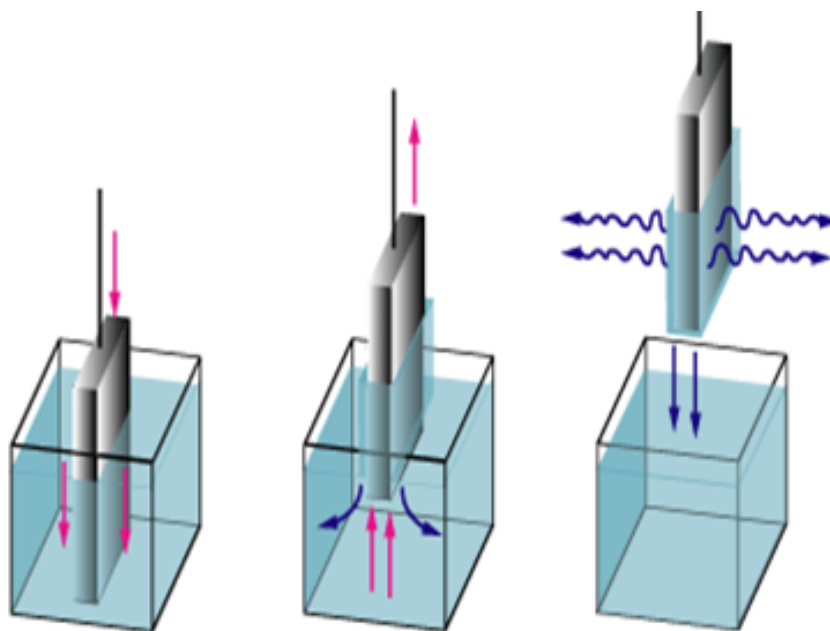

Fig. S1 Dip-coating method for synthesis SPUS

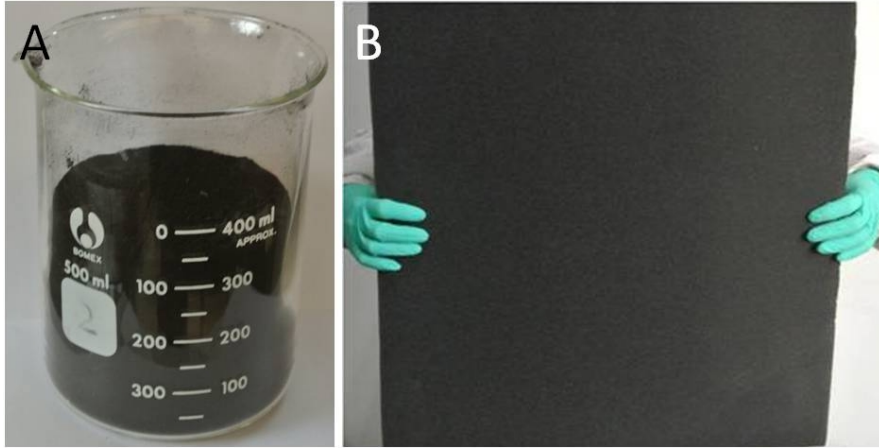

Fig. S2 (A) Photo of soot and (B) Large scale prepared SPUS

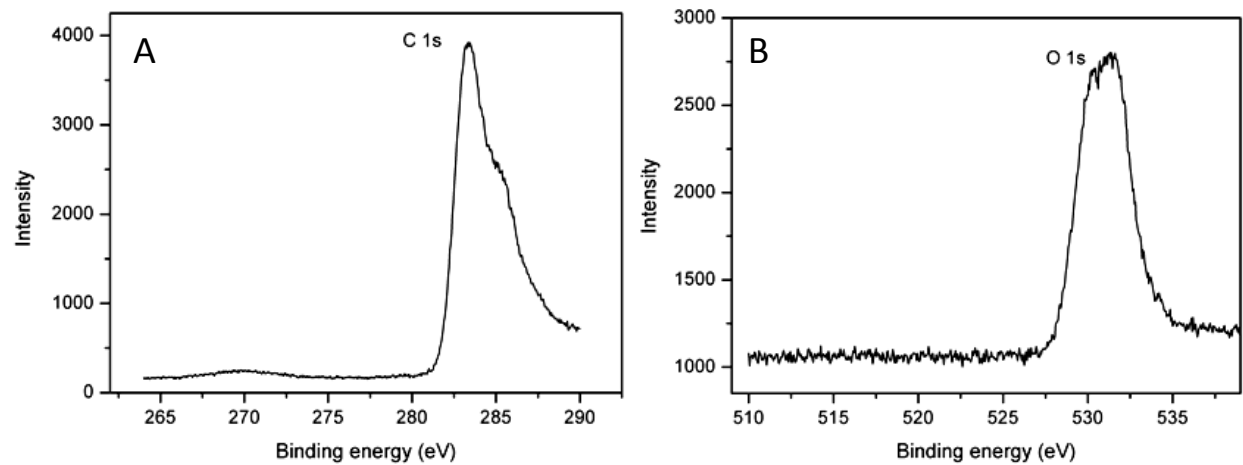

Fig S3 XPS of C1S and O1S of soot

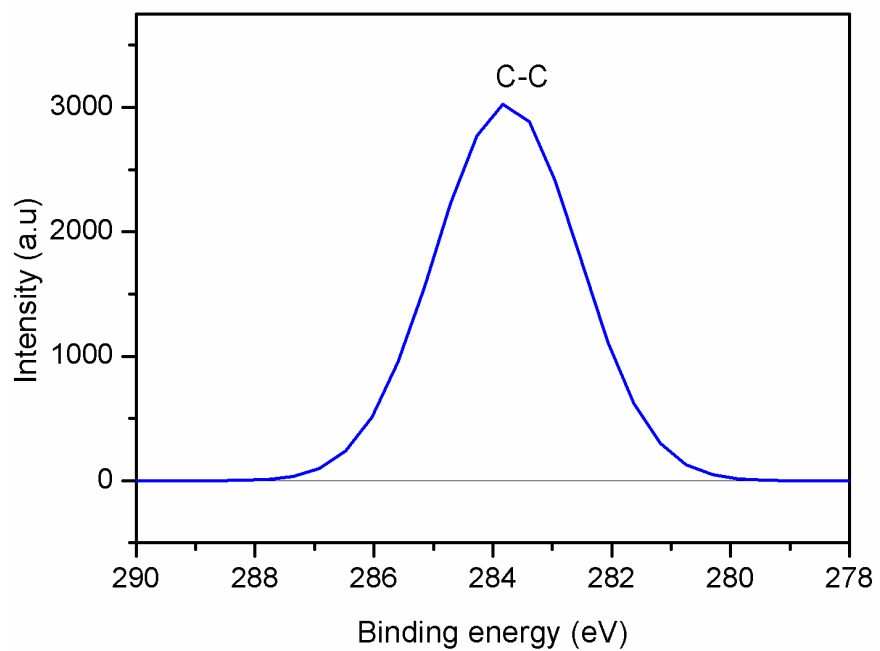

Fig S4 XPS of C-C spectrum of soot

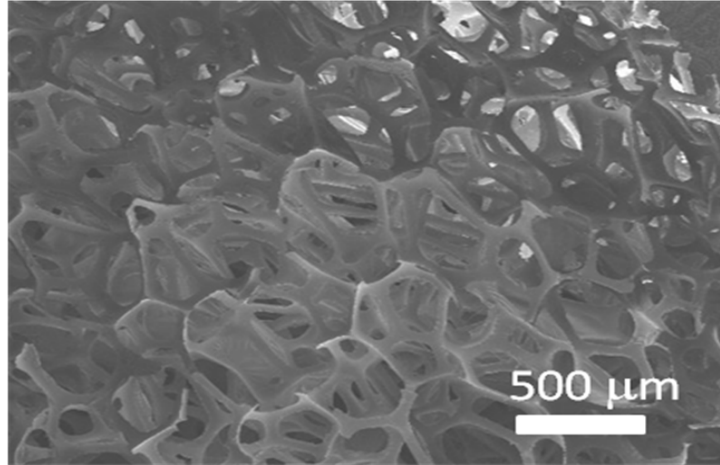

Fig S5 SEM of the scaffold of PUS

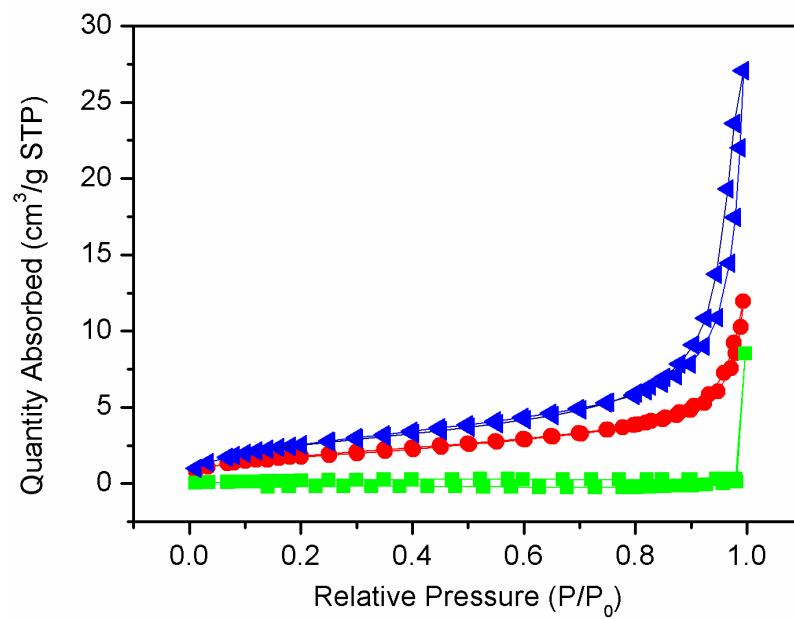

Fig S6 Nitrogen sorption isotherms of the soot(green line), PUS(red line) and SPUS(blue line).

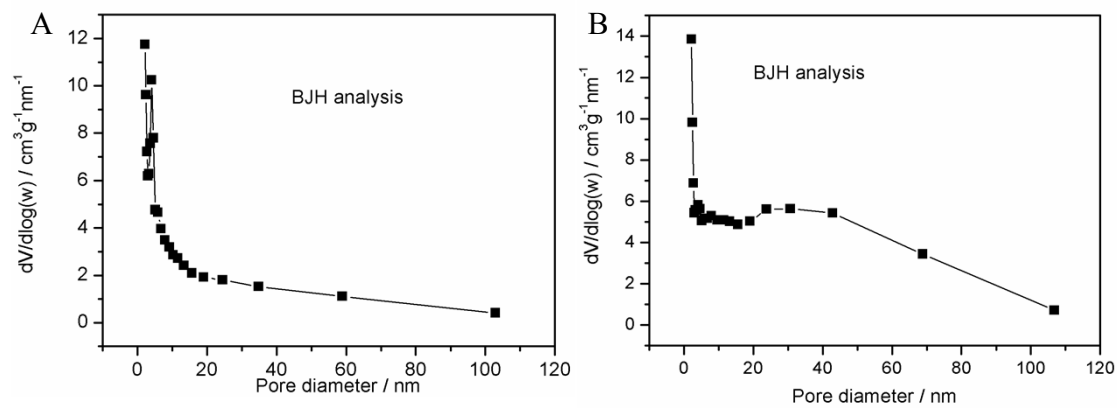

Fig S7 Pore size distribution of (A) soot and (B) SPUS.



Table S1 The relation between the soot loading and water contact angle

| <b>CPUS(Colly Loading)</b> | <b>Water contact angle</b> |
|----------------------------|----------------------------|
| 1%                         | 108.6°                     |
| 4%                         | 120.1°                     |
| 9%                         | 133.3°                     |
| 12%                        | 135.6°                     |
| 17%                        | 142.3°                     |
| 20%                        | 142.4°                     |

Table S2 Comparison of the absorption capacities of various materials

| Sorbent                  | Oil           | Q(g g <sup>-1</sup> ) | Solvent    | Q(g g <sup>-1</sup> ) |
|--------------------------|---------------|-----------------------|------------|-----------------------|
| Sepiolite                | Motor oil     | 0.18                  |            |                       |
| Polydienthylsiloxane     | Motor oil     | 5                     | Chloroform | 11                    |
| Corn stalk               | Gas oil       | 8                     |            |                       |
| Polypropylene            | Fuel oil      | 15.7                  | Toluene    | 11.4                  |
| Butyl rubber             | Crude oil     | 23                    | Toluene    | 17.8                  |
| Modified PU sponge       | Lubricate oil | 25                    | Dodecane   | 18                    |
| CNF carbon foam          | Wash oil      | 28.4                  |            |                       |
| Graphene sponge          | Castor oil    | 75                    | chloroform | 87                    |
| Graphene-CNT hybrid foam | Sesame oil    | 105                   | Toluene    | 130                   |
